# Supplementary material for: A Solution-Processed Tetra-Alkoxylated Zinc Phthalocyanine as Hole Transporting Material for Emerging Photovoltaic Technologies
Source: Hindawi journal article supplement (doi:10.1155/2018/2473152), 2018-11-13

# SUPPORTING INFORMATION

## **A solution-processed tetra-alkoxylated Zinc phthalocyanine as hole transporting material for emerging photovoltaic technologies**

Gloria Zanotti<sup>a\*§</sup>, Giuseppe Mattioli<sup>a\*§</sup>, Anna Maria Paoletti<sup>a</sup>, Giovanna Pennesi<sup>a</sup>, Daniela Caschera<sup>b</sup>, Nitzan Maman<sup>c,d</sup>, Iris Visoly-Fisher<sup>c,d</sup>, Ravi K. Misra<sup>e</sup>, Lioz Etgar<sup>e</sup> and Eugene A. Katz<sup>c,d</sup>

<sup>a</sup>Istituto di Struttura della Materia (ISM) - CNR, Via Salaria km 29.300, 00015 Monterotondo (Rm), Italy.

<sup>b</sup>Istituto per lo Studio dei Materiali Nanostrutturati (ISMN) - CNR, Via Salaria km 29.300, 00015 Monterotondo (Rm), Italy.

<sup>c</sup>Department of Solar Energy and Environmental Physics, Swiss Institute for Dryland Environmental and Energy Research, Jacob Blaustein Institutes for Desert Research, Ben-Gurion University of the Negev, Midreshet Ben-Gurion 8499000, Israel.

<sup>d</sup>Ilse-Katz Institute for Nanoscale Science and Technology, Ben-Gurion University of the Negev, 84105 Be'er Sheva, Israel

<sup>e</sup>Center for Applied Chemistry, The Institute of Chemistry, The Hebrew University of Jerusalem, Jerusalem, Israel

*§ These authors contributed equally to the work*

Figure S1\_a (*n*-BuO)<sub>4</sub>ZnPc <sup>1</sup>H NMR in THF-d<sub>8</sub>. Solvent peaks are labeled for sake of clarity

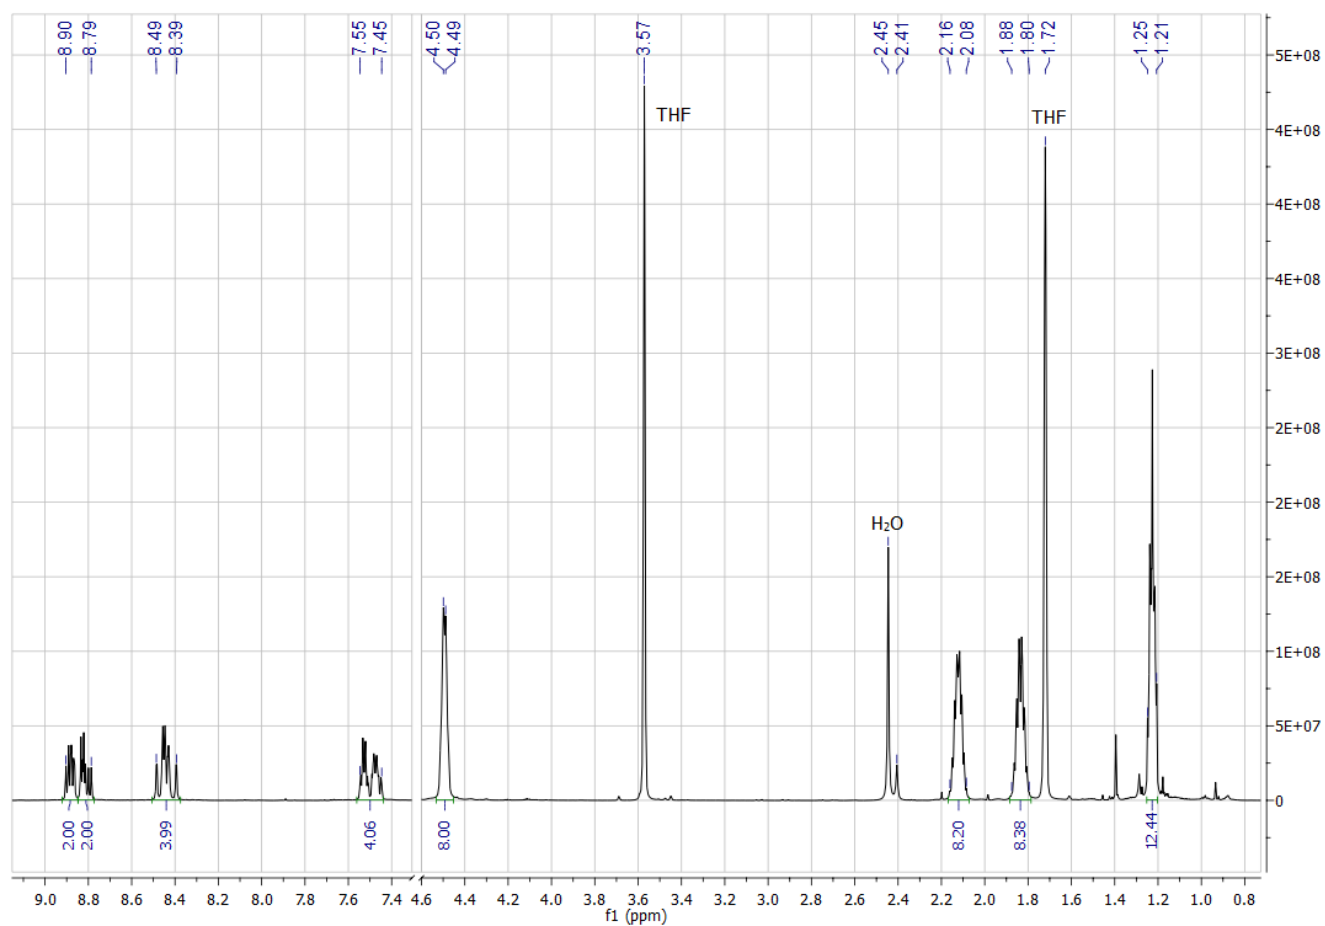

Figure S1\_b: aromatic portion of the NMR spectrum

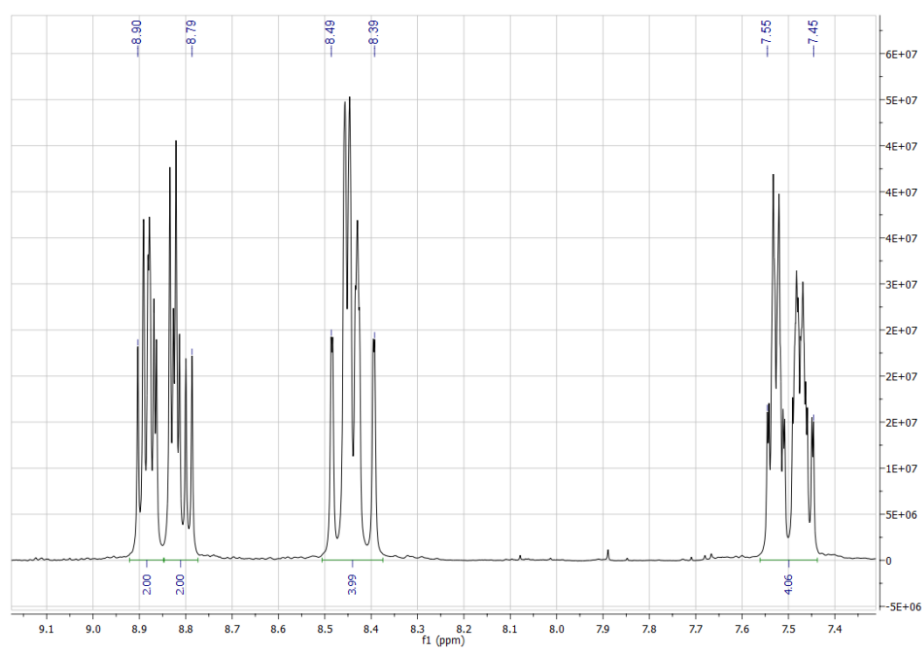

Figure S2: **(*n*-BuO)<sub>4</sub>ZnPc** MALDI-TOF spectrum

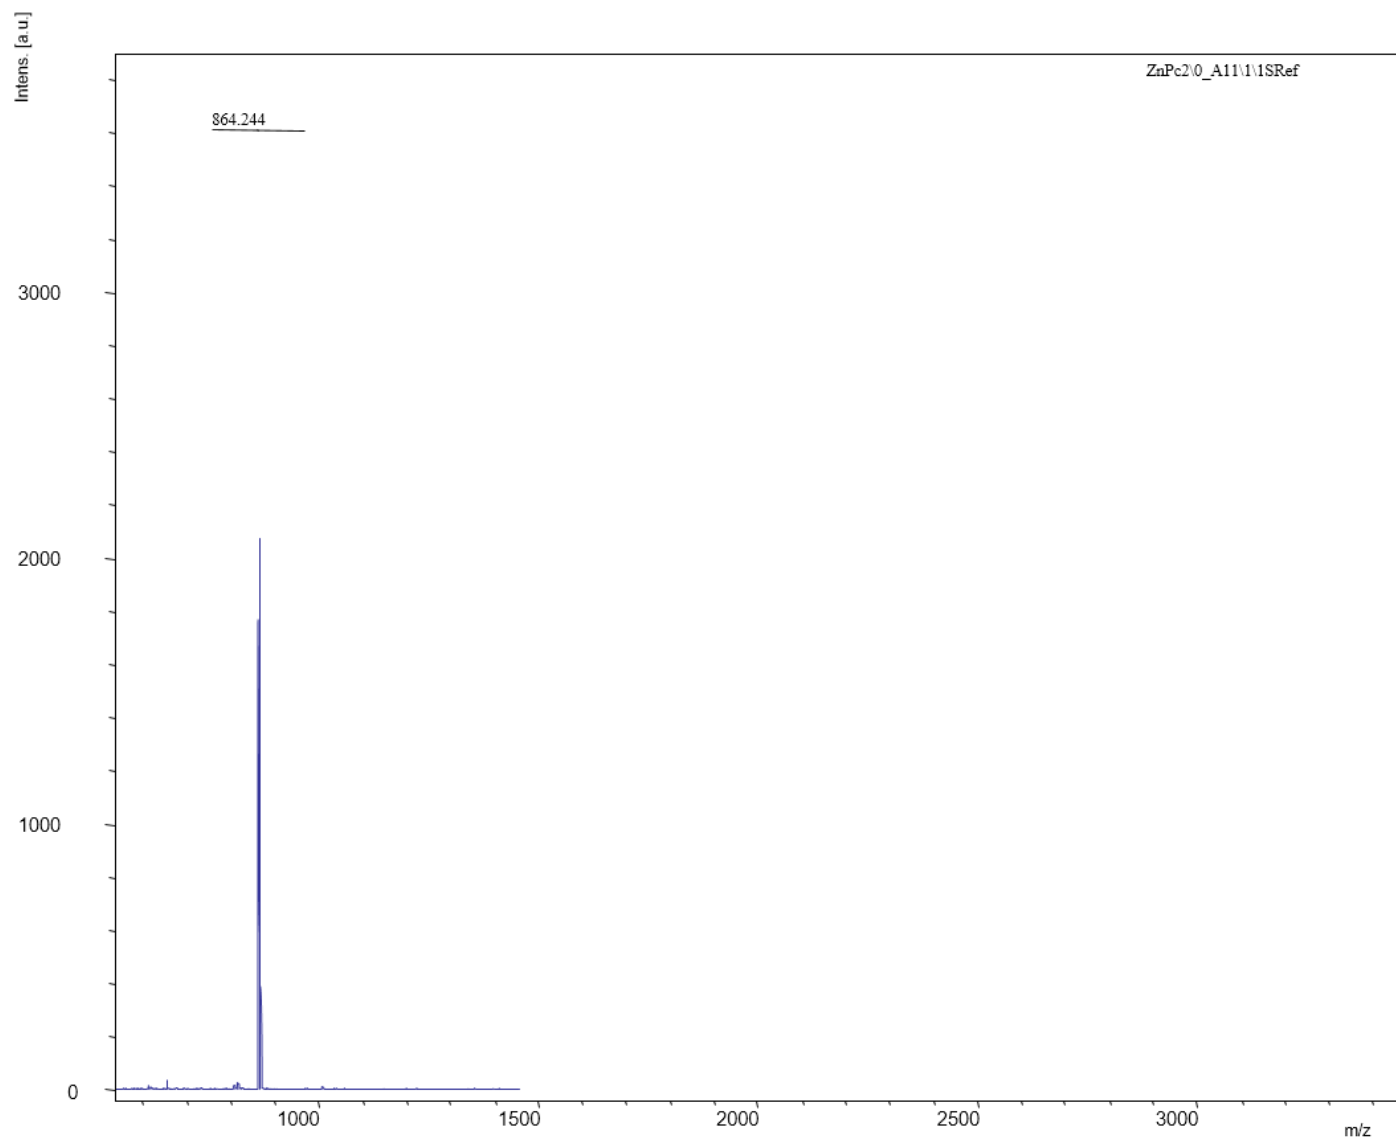

Figure S2 (*n*-BuO)<sub>4</sub>ZnPc anodic scan 0.02 V/s

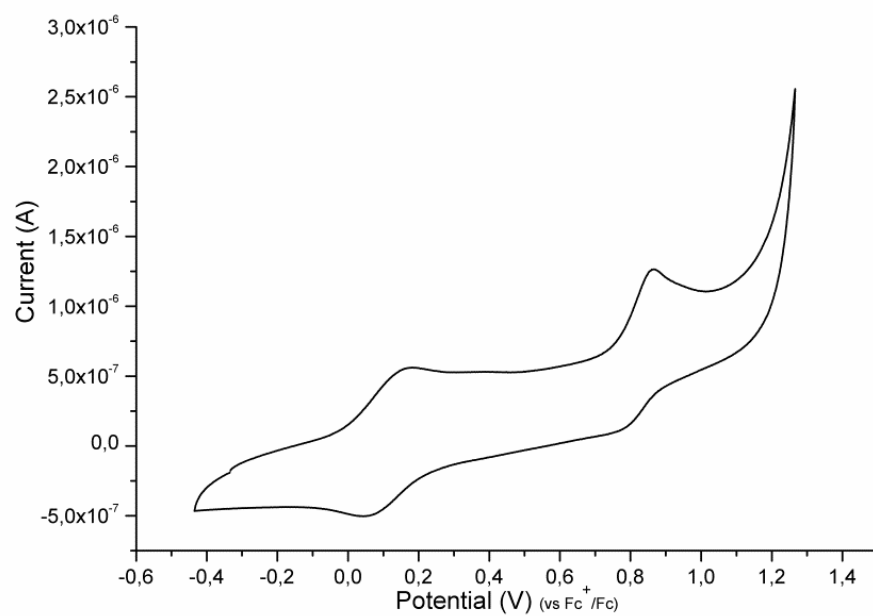

$$E_{\text{ox}}^1 = 0.111 \text{ V vs Fc}^+/\text{Fc}$$

$$E_{\text{ox}}^2 = 0.818 \text{ V vs Fc}^+/\text{Fc}$$

**Table I** Overview of the quoted materials. Values are given for the bulkiest batch purchasable on <https://www.sigmaaldrich.com/italy.html> and on <https://www.tcichemicals.com/en/eu/>

| Chemicals                                | batch   | €/batch | €/g   | required amount per 1g product (g) | (€)/g product |
|------------------------------------------|---------|---------|-------|------------------------------------|---------------|
| 4-butoxyphthalonitrile                   | 5.0 g   | 212.00  | 42.40 | 1.75                               | 74.20         |
| ZnCl <sub>2</sub>                        | 1.0 kg  | 88.90   | 0.09  | 0.298                              | 0.03          |
| DMAE                                     | 2.0 l   | 77.50   | 0.04  | 4.45                               | 0.18          |
| DBU                                      | 2.5 kg  | 888.00  | 0.35  | 0.00155                            | 0.01 (approx) |
| DCM                                      | 4x4.0 l | 215.00  | 0.01  | 93.0                               | 0.93          |
| THF reagent grade, ≥99.0%, w/250 ppm BHT | 2.5 l   | 78.60   | 0.03  | 44.4                               | 1.33          |
| Silica gel (60 Å, 130-270 mesh)          | 1.0 kg  | 175.00  | 0.18  | 50.0                               | 9.00          |

Reagents, solvents and Silica gel have been quoted from Sigma-Aldrich.  
4-*n*-butoxyphthalonitrile has been quoted from TCI chemicals.

**Table II** Comparison of **Spiro-OMeTAD** quotations from different suppliers

|                            | batch (g) | original quotation | quotation (€)* | price/g (€) |
|----------------------------|-----------|--------------------|----------------|-------------|
| Sigma-Aldrich              | 5         | 1212.00 €          | 1212.00        | 242.40      |
| Ossila (unsublimed >99.5%) | 1         | 237.00 £           | 263.91         | 263.91      |
| Ossila (sublimed >99.5%)   | 1         | 363.00 £           | 404.21         | 404.21      |
| Solaronix                  | 5         | 2200.00 CHF        | 1935.71        | 387.14      |

\*Currency conversion has been made on Aug, 20<sup>th</sup> 2018

**Figure S3:** flowchart for the synthesis of 1 kg of  $(n\text{-BuO})_4\text{ZnPc}$ . Reagents quantities are highlighted in red, solvent is highlighted in green and workup/purification materials are highlighted in blue

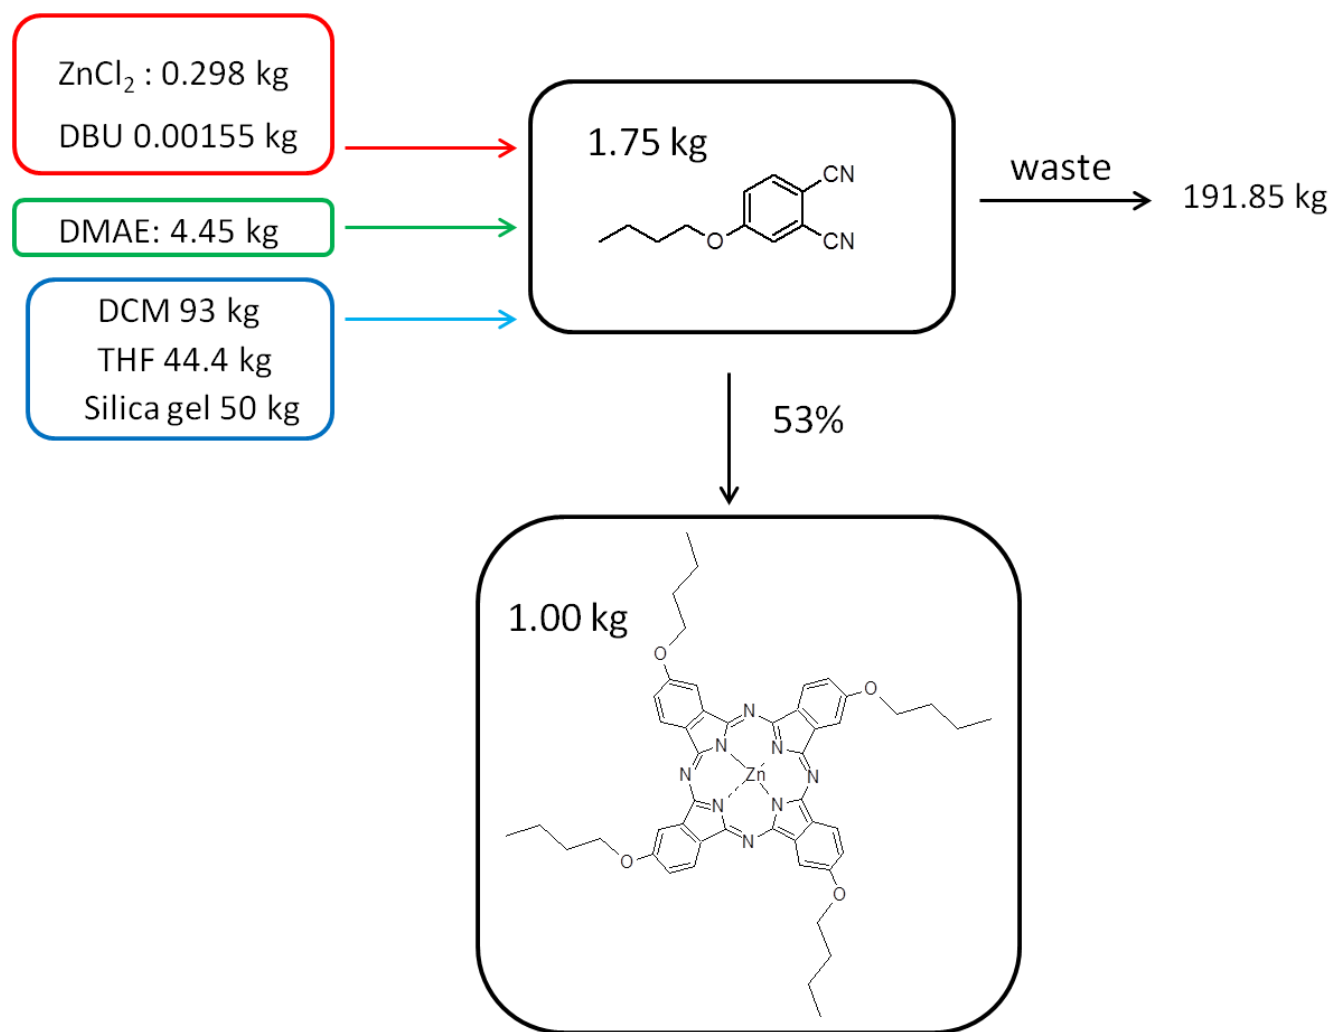

Supplement: f1 [file 2473152.f1.pdf]
